# Supplementary material for: A Review on the Role of Affective Stimuli in Event-Related Frontal Alpha Asymmetry
Source: Frontiers journal article supplement (doi:10.3389/fcomp.2022.869123), 2022-07-01
Supplement: Table_1.docx [file Table_1.docx]

Supplementary Table 1: Overview of studies divided into stimulus types as presented in Table 1 in the main manuscript with more information on the stimuli, context, participants and results. Participant’s handedness is included in the participants column by R (right-handed), L (left-handed) or NA (not available).

| **Study** | **Stimuli** | **Context** | **Participants** | **Results** |
| --- | --- | --- | --- | --- |
| **Images & Sounds (n=18): Images (n=16), sounds (n=2)** | | | | |
| [Deng et al., 2021](#_bookmark54) | Viewing pictures (including neutral, positive, negative and drug-related contents) before and after the training. | Explore effect of working memory training (WMT) on emotion regulation in drug abstainers. | 40 male drug abstainers: training group (n=20) with running memory task and control group (n=20) without training task  R | Training group adopted more spontaneous emotion regulation strategies and improved asymmetry scores when viewing negative and drug-related pictures compared to pretest, suggesting right-to-left brain asymmetry conversion, WMT enhances emotion regulation of drug abstainers. No main effect of picture type. |
| Grassini et al., 2020 | Images depicting snakes, spiders, butterflies, and birds. | Investigating whether asymmetrical frontal activity is modulated by evolutionarily threatening stimuli. | 34 students (28 female)  R | Late frontal positive potential (f-LPP) asymmetry, but not alpha asymmetry was modulated by stimulus category, especially threatening stimuli led to large f-LPPs over right-frontal hemisphere; no effect in frontal alpha asymmetry for images. |
| Gayathiri et al., 2020 | Neutral and high valence and arousal (HVHA) pictures from the International Affective Picture System (IAPS). | Major depressive disorder: analyze brain activity during emotional processing in depressed individuals. | 15 adults suffering from major depressive disorder (7 male)  NA | Higher relative right frontal activity (withdrawal) for viewing HVHA and neutral pictures compared to resting periods. |
| Adolph et al., 2017 | Passively viewing negative, neutral, and positive emotional pictures. | Investigate the association of frontal asymmetry with attentional and emotional responses to approach- and avoidance-related emotional stimuli. | 43 students (28 female)  R | FAA for picture viewing was not different for picture type; greater right frontal activation was associated with increased N1 amplitudes and more negative subjective assessment of all stimuli. |
| Schöne et al., 2016 | Erotic pictures (high salience to evoke approach motivation), pictures of dressed attractive women and control pictures (extreme sport and daily activities). | Explore whether alpha asymmetry can be elicited by brief affective motivational stimuli, as typically used in event-related designs. | 17 male students  NA | Relative alpha reduction on left hemisphere for erotic pictures and significant asymmetry for daily activity pictures. |
| Gable and Poole, 2014 | Anger pictures and neutral pictures. | Explore influence of traits related to behavioral approach or avoidance on responses to anger- eliciting stimuli using multiple measures: event-related potentials, electroencephalographic (EEG) alpha asymmetry and self-report. | 32 introductory psychology students (15 female)  R | No significant effect of picture type for alpha asymmetry; behavioral approach system scale predicted greater left- frontal asymmetry to anger pictures; larger LPPs related to larger left-frontal EEG asymmetry for anger pictures. |
| Uusberg et al., 2014 | Affective pictures ranging from very pleasant to unpleasant. | Testing explanation that alpha asymmetry fails to emerge (especially for affective pictures) due to insufficient motivational intensity, and/ or overshadowing inter-individual differences within responses to emotional pictures. | 70 students (28 male)  NA | Stimuli did not induce expected asymmetry effects, even though systematic stimulus-dependent individual differences arose in self-reports and LPP amplitudes, asymmetry variability was dominated by stimulus-independent inter-individual differences. |
| Ischebeck et al., 2014 | Neutral, aversive, and OCD-related pictures. | Exploring whether alpha asymmetry linked to approach/ avoidance, indexes risk for anxiety disorders and depression. | 20 patients (9 male) with obsessive-compulsive disorder (OCD) and 20 matched healthy controls (8 male)  R | Compared to the control group, OCD patients showed altered asymmetry, with frontal alpha power in the 8-10 Hz band being more dominant in the left hemisphere across all conditions, no significant differences in frontal alpha asymmetry during rest, negative, neutral, OCD- related pictures. |
| Poole and Gable, 2014 | Approach-positive, approach-negative, and withdrawal- negative pictures from the internet and IAPS. | Illuminate whether frontal asymmetry is related to motivation or affective valence by examining frontal- lateralized late positive potentials (f-LPPs) and frontal cortical alpha power activation. | Forty-eight students (36 female)  R | Approach-negative and withdrawal-negative pictures in comparison to neutral pictures did not evoke differences in frontal alpha asymmetry; f- LPP results support relation between asymmetric hemisphere activation and motivational direction rather than affective valence. |
| Huster et al., 2009 | 36 photographs from the IAPS in restricted randomized order- three pictures of the same affective category presented successively. | Investigate on minimum number of stimuli required for psychometrically stable outcomes. | 28 students (13 female)  R | Significant effects of affective picture category: negative affective stimuli relative to positive led to lower alpha power density, which was more pronounced in the right hemisphere. |
| Rabe et al., 2008 | Four pictures (from IAPS) for one minute each of category neutral, positive, negative, and trauma-related. | Explore changes in neural processing through cognitive behavioral therapy (CBT) in patients with posttraumatic stress disorder (PTSD) following severe motor vehicle accidents. | Participants with PTSD/ subsyndromal PTSD receiving CBT (n = 17, 15 females) before and after a CBT program, wait-list controls (n = 18, 10 females) investigated before and after three months  R | pre-treatment assessment: Increased right-sided activation during exposure to trauma- related picture (compared to neutral picture) observed in both CBT and wait-list subjects; post-treatment: Greater reduction of right frontal activation in CBT group relative to waitlist controls; in both groups PTSD symptom reduction was significantly correlated with a decrease in right frontal activation in response to the trauma stimulus. |
| Wiedemann et al., 1999 | Neutral, panic-relevant, anxiety-relevant but panic-irrelevant, or anxiety-irrelevant but emotionally relevant pictures, and performance of a motor task. | Expectation of greater right than left frontal hemisphere activation for patients with panic disorder since they are characterized by negative emotions and avoidance-withdrawal behavior. | Patients with panic disorder without a diagnosis of depression (n=23, 3 male) and healthy control participants (n=25, 6 male)  R | Right compared to the left frontal alpha power was significantly decreased during resting phases and when confronted with anxiety-relevant stimuli in patients with panic disorder, comparable frontal asymmetry for patient and controls during neutral picture viewing or performing a motor task. |
| Gable and Harmon-Jones, 2008 | Pictures of dessert or neutral pictures of objects. | Explore the role of individual differences in emotive tendencies for positive stimuli and relation to regional brain activation. | 26 female students  R | Picture stimuli alone did not evoke asymmetrical frontal cortical activity, regression analysis showed more time since eaten (/dessert liking) was significantly correlated to higher relative left frontal activation for dessert pictures; for neutral pictures this was not the case. |
| Winter et al., 2016 | Food images. | Investigate restrained eating and hedonic hunger in relation to frontal asymmetry. | 58 female participants paid two visits: once fed once fasted  R | No significant difference by hunger state in frontal asymmetry score, higher Power of Food scores were associated with increased left frontal asymmetry; higher Restraint Scores were associated with increased right frontal asymmetry, main effect for overweight individuals showing increased left asymmetry compared to normal weight. |
| Crabbe et al., 2007 | Unpleasant, neutral and pleasant pictures, selected from IAPS before after rest/ exercise condition. | Examine effect of 30 min of cycling exercise compared to 30 min of rest on emotional responses to pictures. | 34 volunteers (13 female) from university and surrounding (young, fit and active)  R | Exercise did not alter frontal alpha asymmetry responses during picture viewing. |
| Cartocci et al., 2018 | Six neutral images from IAPS, followed by ten ineffective, effective, and awarded anti-smoking Public Service Announcements (PSAs). | Investigating the response to differently effective anti-smoking PSAs in the young population (higher risk of developing tobacco addiction). | 39 volunteers: 3 HS (heavy smokers), 11 LS (light smokers), 15 NS (non-smokers)  NA | Main effect of smoking habit: non-smokers expressed lower frontal alpha asymmetry compared to HS and LS, effective PSAs led to increase in frontal alpha asymmetry for HS group compared to LS and NS, regression analysis for effective PSAs revealed a correlation between the number of cigarettes regularly smoked and relative frontal alpha asymmetry. |
| Papousek et al., 2018 | Three sound recordings (90s each): anger/ aggression, sadness/ desperation, neutral (reference). | Explore inter-personal differences in motivational responses to sound recordings of individual’s desperation and aggression and its relationship with DSM-5 personality traits. | 62 university students (30 male)  R | Anger: Higher antagonism levels displayed approach motivation (less relative right hemisphere activation), desperate crying: higher detachment levels showed withdrawal activation (greater relative right hemisphere activation). |
| Chen et al., 2015 | Sound stimuli (scary and soothing). | Investigating responses to scary and soothing sound stimuli assessed by frontal alpha asymmetry and the emotion (AAE) and Comfort Vector (CV) models. | 18 healthy students (16 male) divided into three groups based on their baseline frontal asymmetry  NA | Scary sound stimulus: groups 1 and 3 displayed a decrease in frontal asymmetry (AAE) and in pleasantness (CV model); correlation between AAE and CV models for scary stimulus, but not for soothing stimulus. |
| **Videos (n=15)** | | | | |
| Olszewska-Guizzo et al., 2021 | Nine fixed-frame videos, filmed before the pandemic: busy downtown and residential green. | Investigating longitudinal changes in frontal alpha asymmetry due to COVID-19 pandemic and exploring the role of nature exposure on mental health and well-being. | 25 healthy adult Singaporeans (14 female)  R | Significantly higher frontal alpha asymmetry before pandemic compared to lockdown, landscape (video type) had no significant effect on frontal alpha asymmetry; decrease in frontal alpha asymmetry. |
| Joaquim et al., 2020 | Emotion-eliciting commercials, two times respectively: neutral, tenderness, amusement, sadness, disgust, anger and fear. | Deeper understanding of human emotional states, exploration of deep learning techniques to analyze physiological data using a raw two-channel pre-frontal EEG and photoplethysmography. | 25 male and female subjects  NA | Trend in correlation between frontal asymmetry index (low alpha frequency band) and negative emotions evoked by commercials. |
| Zhao et al., 2018 | Three film excerpts (standard emotional film database) to evoke three emotions: tenderness, anger, and neutrality. | Explore valence and motivational direction model of frontal alpha asymmetry. | 37 students (17 males)  R | Higher left frontal activation during tender film, hence tenderness (positive emotion) related to approach motivation; increased right frontal activation during anger-eliciting video, suggesting anger (negative emotion) associated with withdrawal motivation. |
| Cartocci et al., 2017 | Spots and images of awarded, effective and ineffective antismoking public service announcements (PSAs). | Study responses to selected PSAs using EEG and auto- nomic signals. | 22 young healthy subjects (7 non-smokers, 9 light-smokers, 6 heavy- smokers)  NA | Increased approach withdrawal (AW) index for “awarded” video spot compared to “ineffective” one; AW index between the three image campaigns was not statistically different. |
| Papousek et al., 2014 | Film comprising scenes of real injury and death. | Exploring relevance of individual differences in EEG alpha in response to emotional events. | 148 female university students  R | While watching the film the magnitude of EEG alpha asymmetry response correlated with transient heart rate in response to sudden horrifying events happening to people (withdrawal/avoidance motivation and increased attention), viewing video showing disaster led to shift of dorsolateral prefrontal asymmetry to the right side. |
| Prause et al., 2014 | Neutral and a sexually motivating film. | Extend approach (/avoidance) motivation-model in response to pleasant, high- arousal, approach motivation, sexual stimuli, which may play an important role to reward system function. | 65 participants (22 females)  R | Decreased asymmetry score during sexual film compared to neutral film; positive relationship between self-reported sexual arousal and alpha asymmetry, EEG alpha power coherence was stronger in women. |
| Vecchiato et al., 2014 | TV commercials. | Relate brain activity and autonomic parameters to estimate emotional valence, arousal and approach- withdrawal (AW) behavior in marketing contexts. | Experiment 1: 15 healthy volunteers (7 female); experiment 2: 24 subjects (12 female); whole sample divided into like and dislike groups, based on rated pleasantness score on clips.  NA | Experiment 1: No alpha asymmetry assessed; experiment 2: Temporal variations in frontal alpha asymmetry show differences between young and old viewers, AW-index displayed two segments were significantly different between like and dislike group. |
| Hosseini et al., 2007 | Movie clips from cinema and documentary repertoires to induce relaxation, happiness, anxiety and sadness. | Explore patterns of asymmetries in reaction to affective film stimuli for different personality groups (extroverts, introverts, neurotics and emotionally stables). | 40 female students  R | Patterns of activation were different between personality groups, partly consistent with approach-withdrawal model, right frontal asymmetry for introverts and emotionally stables in anxiety state. |
| Aftanas and Varlamov, 2004 | Emotional film clips (neutral, relaxation, joy, anger, sexual arousal, disgust, fear, sadness, stress stimulation). | Examine the effect of alexithymia on regional brain activity during emotion-inducing videos. | Non-alexithymic (n =27, 7 male) and alexithymic (n = 17, 14 male) participants  R | Alexithymics showed overall enhanced right hemispheric activity in response to positive and negative films, indicating avoidance motivation. |
| Hakim et al., 2021 | Video commercials of six food products (3 x 6 commercials = 18 views). | Improve choice prediction for marketing research using EEG and machine learning, instead of self- reports alone. | 33 (13 male) subjects  NA | No significant difference for watching product commercials of distant rankings nor close mid-ranged rankings in alpha asymmetry. |
| Walsh et al., 2017 | Videos of food concerns (safety, hygiene and spoilage) and matched control (no food concern). | Improve understanding of consumers’ emotional response to food using implicit physiological tools next to traditional sensory techniques. | 40 students (31 female)  R | Significant difference between spoilage videos, with greater activation of the right hemisphere (withdrawal), no differences for hygiene and safety concern videos. |
| Hajal et al., 2017 | Videos of own infants expressing distress. | Look at association between mothers’ neural activity (frontal alpha asymmetry) and emotions (facial expressions) and their appraisal processes (parenting efficacy). | 26 mothers of 5- to 8-month-olds  R | Infant distress videos have led to increased right hemispheric activity, associated with longer sad and tense face expressions in mothers of average or lower parenting efficacy. |
| McGeown and Davis, 2018 | Chips to eat and video of confederate eating (EEG recording), visual-probe task: 20 food (highest ratings on food cravings) and non-food items. | Investigate whether frontal alpha asymmetry moderates attentional bias (AB) to food and body mass index (BMI). | 93 female students  R | Significant association of higher AB towards food pictures and larger BMI for participants with left frontal alpha asymmetry, overweight individuals compared to others showed increased left frontal alpha asymmetry when watching the video, and greater AB towards food pictures. |
| Missana and Grossmann, 2015 | Dynamic happy and fearful body expressions presented as point-lighted two second clips. | Perception of emotional body expressions evokes brain responses linked to motivational processes in infants. | 20 four-month-old (10 female) and 20 eight-month-old (10 female) infants  NA | Emotional expressions presented in upright orientation led to significant differences in frontal asymmetry responses for 8-month-olds only: greater lateralization to left hemisphere (approach) in response to happy expression, and greater lateralization to the right hemisphere (withdrawal) in response to fearful expressions. |
| Lee et al., 2017 | Experiment 1: visual music as an emotional stimulus experiment 2: synthetic stimuli. | Explore emotional meanings of visual music and its underlying affective audio-visual integration mechanisms between different modalities. | Experiment 1: 16 people, experiment 2 with students divided into groups: audio-only (n=33), visual-only (n=27), original (n=42) and altered (n=53) visual music  NA | EEG measured for experiment 1 only, where for visual music stimulus early phase (first 10s) frontal alpha asymmetry correlated significantly with perceived valence evaluation. |
| **Real cues (n=11)** | | | | |
| Kline et al., 2000 | Pleasant (vanilla), unpleasant (valerian), and neutral (water) odors. | Explore changes in frontal alpha asymmetry in response to odors. | 58 women, aged between 58 and 70  NA | Vanilla compared to valerian and water induced relative left frontal activation; frontal alpha asymmetry was not different for valerian compared to water. |
| Kaneko et al., 2019 | Drink samples: apple juice, orange juice, yogurt drink, milk, buttermilk, rooibos tea, black tea, cola, diluted vinegar. | Compare performance of explicit ratings, (neuro)physiological and behavioral measure in distinguishing drinks inducing different emotional experience. | 70 healthy participants (19 men)  NA | Valence and arousal ratings for vinegar solution were lowest and highest of all drinks hence suitable as ground truth, frontal alpha asymmetry: no significant difference hence not sensitive enough to distinguish between drinks. |
| Lagast et al., 2020 | Universally accepted (sucrose) and non-accepted (caffeine) solution, a personally selected accepted and non- accepted drink, and plain water. | Exploring consumers’ experience during drink- tasting by means of arousal (heart rate, electrodermal responses) and approach/withdrawal motivation (frontal alpha asymmetry). | 32 participants  NA | No significant difference when tasting different drinks was observed for frontal alpha asymmetry. |
| [Sargent et al., 2020](#_bookmark87) | Two machines to prepare hot beverage. | Explore body (electrodermal activity, EDA) and brain activity (EEG) correlates during hot beverage preparation, and consumption in a real office environment. | 26 participants (14 females)  R | Market leader’s user interface had higher self-reported product preference supported by significant differences in arousal (EDA) and valence (EEG) during coffee production and drinking. |
| Brouwer et al., 2017 | Cooking and tasting two stir-fry dishes (chicken and mealworms). | Investigate implicit food preferences and choices using neurophysiological measures. | 41 participants (19 female)  NA | Frontal alpha asymmetry results show constant effect of ‘approach’ for chicken and ‘avoidance’ for mealworms present throughout entire cooking and tasting session, in frying interval this effect was significant. |
| Olszewska-Guizzo et al., 2020 | Six landscape scenes within two urban green spaces (park and neighborhood green space) and three scenes of a busy urban downtown (control). | Explore association between urban green space exposure and mental health. | 22 adults (13 female)  R | Trend: Increased frontal alpha asymmetry in park compared to control site, indicating more positive mood, trend for interaction between site and scene suggestive of individual site variability. |
| Knott et al., 2008 | Induction neutral (holding a pen) or depressive (cigarette- cue exposure: holding lighted cigarette over an ashtray without bringing to mouth) mood. | Explore neural basis of evoked cigarette craving and variations due to induced depressed mood, gender differences and smoker type. | 11 (5 male) regular and 11 (6 male) light smokers  NA | Cigarette-cue exposure led to reduced left frontal alpha asymmetry (withdrawal), increased cravings and negative affect, especially in female and regular smokers. |
| Modica et al., 2018 | Experiment 1: 15s visual and visio-tactile exploration (VE and VTE) of two daily food (major and private label) and two comfort food items (foreign and local product); experiment 2: 15s tactile exploration (TE), VE and VTE of four different comfort and daily foods, two local and foreign products (major or private brand). | Investigate cross-sensory (sight and touch) evoked EEG and the autonomic reactions over different products. | Experiment 1: n=19; experiment 2: n=13 (5 males)  NA | Higher approach for comfort compared to daily food in VE and VTE, increased approach withdrawal (AW) index for foreign relative to local products during VE and VTE, but not in TE, higher AW for private relative to major label during VTE (experiment 2), greater AW and emotional index (EI) for foreign relative to local products during VTE, phases not significantly different. |
| Bolinger et al., 2020 | Positive prompts: express love, play peek-a-boo and sing; negative prompts: pretend infant has a rash and crawled to an electrical outlet. | Characterize basic neurophysiological features behind affective function at developmental age, where emotional expression emerges. | 25 infant (-parent dyads), 12 females  NA | Negative prompts induced strong right hemispheric increase in the prominence of the resonant frequency (∼5–6 Hz) in the infant frontal EEG; asymmetry scores during the other states (positive and neutral) did not statistically differ from zero. |
| Uusberg et al., 2015 | Degrees of social contact, varied by different gaze directions of a ”live” model. | Anterior functional brain asymmetry has been linked to individual differences in affect and motivation, exploring its relation with the Five Factor Model personality traits. | 40 students (13 male)  R/L | Negative relation of neuroticism to anterior EEG asymmetry scores in response to direct gaze, indicating that greater levels of neuroticism were associated with relative right-sided functional brain asymmetry (avoidance). |
| Pönkänen and Hietanen, 2012 | For the participants unknown faces of two young females, neutral and smiling with a direct and an averted gaze, presented ”live” through a liquid crystal shutter. | Modulation of autonomic arousal and frontal EEG alpha-band asymmetry by facial expression (neutral vs. social smile) and direct vs. an averted gaze. | 22 right-handed female undergraduates  R | Gaze direction and facial expression did not affect frontal EEG asymmetry. |
| **Games (n=5)** | | | | |
| Rodrigues et al., 2018 | Move around freely in a virtual T maze via joystick, with monster trial (negative event) and sheep trial (positive event). | Investigation of theories:  - motivational model  - bilateral frontal activation part of behavioral activation system if actual behavior is shown  - linked model of reinforcement sensitivity  - here: Relative left frontal activation shows revised behavioral activation system and behavior, and relative right frontal brain activation indicates revised behavioral inhibition system, representing experience of conflict. | 30 participants (12 male)  R | Virtual reality task: Increased relative left frontal brain activation during approach behavior and greater relative right brain activation for withdrawal behavior of any kind; increased bilateral frontal activation when participants were engaged in behavior relative to doing nothing; frontal asymmetry represents behavioral approach or avoidance motivation, bilateral frontal activation representative for behavior, observable behavior determined by frontal asymmetry and relevant traits. |
| [Shankman et al., 2007](#_bookmark53) | Bogus computerized slot machine paradigm with three reels of numbers and fruit and two different payoff situations: reward (R) and no incentive (NI). | Depression characterized with reduced reward-seeking behavior (approach motivation) hence reduced left frontal activity, two neural systems of motivation and emotion hypothesized to be responsible for individual differences in emotional reactivity or affective styles. | 70 individuals with current MDD (about 29% male) 37 control participants (about 34% male)  R | No condition-dependent difference in hemispheric asymmetry among depressed compared to control; during the approach task control participants and individuals with late-onset depression showed increase in left frontal activity but individuals with early-onset depression did not. |
| Harmon-Jones et al., 2008 | Cues indicating that an easy, medium, or hard anagram (scrambled word) would be presented and whether they would receive money or avoid losing money for the correct solution. | Dysregulation theory of bipolar disorder: Individuals with bipolar disorder would display greater relative left frontal activity in response to goal striving, especially positive challenges. | Individuals with bipolar spectrum diagnosis (n=41, 61% female) and individuals with no major affective psychopathology (n=53, 49% female)  R | Individuals with bipolar disorder compared to non-bipolar individuals showed higher relative left frontal activation in preparation for the hard/win trials, non- bipolar individuals showed a decrease in left frontal cortical activation from medium to hard win trials, when bipolar individuals did not; also bipolar individuals’ self-reported activation was related to more left frontal activation for the hard/win trials. |
| Miller and Tomarken, 2001 | Delayed reaction time task including manipulations of incentive, expectancy, and response. | Clarify psychological functions associated with frontal brain asymmetry. | 60 students (30 male)  R | Variations in monetary incentives led to changes in frontal alpha asymmetry, higher relative left alpha suppression during reward compared to punishment conditions; manipulations of expectancies related to mid-frontal EEG changes, which were different for men and women. |
| Sobotka et al., 1992 | Responding to displayed up or downward pointing arrows using finger press or finger lift response. | Effect of manipulations of reward and punishment contingencies on brain’s electrical activity. | 15 students (7 male)  R | Reward trials associated with less alpha power in left frontal regions compared to punishment trials, which were associated with less alpha power in the right frontal regions. |
| **Other tasks (n=12): Imagery (n=4), modifying facial expression (n=2), speech, reading and writing (n=6)** | | | | |
| Mennella et al., 2015 | Imagery task including pleasant, neutral, and unpleasant narratives. | Investigating influence of dysphoria on anterior and posterior sites during emotional task. | Dysphoric (n=23) and non-dysphoric (n=24) individuals  R | Group with dysphoria showed reduced left cortical activity at anterior sites irrespective of emotional condition, at posterior sites they showed reduced rather than increased right parietal activity during unpleasant imagery compared to non-dysphoric individuals. The authors relate this to hemispheric functional differences at anterior sites with respect to verbal and visuo-spatial processing. |
| Wacker et al., 2008 | Emotional imagery scripts of three scenarios of approach-avoidance conflict (approach a fear-provoking object/ situation to get to a desired goal). | Compare widely adopted model with alternative relating left anterior region to behavioral activation independent of direction of behavior (approach or withdrawal) and right anterior region to goal conflict-induced behavioral inhibition. | 93 young men either high or low in trait behavioral inhibition system sensitivity  R | High BIS sensitivity group had a significant change toward right-sided activation from pre-stimulus to imagery phase, results in favor of behavioral activation and inhibition model. |
| Wacker et al., 2003 | Emotional imagery. | Disentangle influences of emotion and motivational direction (MOT) on frontal alpha asymmetry. | 109 active, male soccer players  R | Irrespective of MOT, anger compared to fear led to larger changes toward relative left frontal activation (LFA); higher negative valence ratings were associated with greater changes toward LFA in withdrawal but with larger changes toward relative right frontal activation in approach. |
| Papousek et al., 2017 | Reappraisal Inventiveness Test with anger-eliciting vignettes. | Correlation of frontal EEG alpha asymmetry with capacity for cognitive reappraisal in terms of the participants’ inventiveness in generating alternative appraisals of anger-evoking events as compared to generating alternative uses for conventional, emotionally neutral objects. | 78 female university  students of different faculties  R | Individuals with higher capacity for generating cognitive reappraisals showed increased left- lateralized activity in lateral pre- frontal cortex – no effect between the two emotional conditions. |
| Stewart et al., 2014 | Facial emotion task - make approach (angry and happy) and withdrawal (afraid and sad) facial expressions. | Testing whether brain activity during emotional challenge will be a more powerful indicator of predispositions toward psychopathology than activity observed at rest. | Individuals with (MDD+, n=143) and without (MDD-, n=163) lifetime major depressive disorder (MDD)  R | MDD+ group displayed relatively less left frontal activity than life- time MDD- group during approach condition as well as withdrawal condition; current-source density transformed asymmetry indicative of lifetime MDD status under resting and task-elicited conditions. |
| Coan et al., 2001 | Producing facial configurations denoting anger, disgust, fear, joy, and sadness. | Emotion eliciting potential of voluntary facial movement and approach-withdrawal model are investigated. | 36 students (10 male)  R | Facial poses of emotions in the withdrawal condition compared to approach and control conditions led to relatively less left frontal activation; approach condition less supportive of approach-withdrawal model. |
| Pérez-Edgar et al., 2013 | Dot-probe paradigm with face pairs depicting angry, happy, and neutral emotional expressions and stressful speech condition. | Frontal EEG asymmetry patterns at rest and under social threat among young adults. | 45 students (23 male)  R/L | Increased right frontal alpha asymmetry difference (from baseline to stressful speech condition) associated with attentional bias to angry faces and avoidance of happy faces. |
| Wang et al., 2015 | Give public speech. | Explore neural electrical changes correlated with expressive writing in a reappraisal approach. | 92 university students, divided into three groups: reappraisal writing, irrelevant writing, non-writing  R | During writing manipulation reappraisal group showed lower frontal alpha asymmetry scores but following re-exposure to stress they showed higher frontal alpha asymmetry scores than irrelevant writing group; frontal alpha asymmetry of non- writing group did not change significantly across different stages. |
| Li et al., 2016 | Writing task describing an anger-eliciting event, where participants were irritated by people with higher or lower social power. | Explore neural mechanism behind power and its influence on expression tendency. | 29 students (13 male)  R | High social power was associate with increased anger expression tendency and greater left frontal activation compared to low social power. |
| Rejer and Jankowski, 2017 | Internet advertisements during a text-reading task. | Effect of the interruption on a web user is analyzed directly by studying brain activity. | 6 subjects (5 male)  R | Advertisement presentation induces changes in the frontal/ pre-frontal asymmetry index, direction of change differed among the subjects. |
| Brouwer et al., 2015a | Reading a novel with emotional and non- emotional sections. | Examine physiological signals during the reading of a novel or other long text. | 71 participants (35  female)  NA | On average greater frontal alpha asymmetry for high than low emotional sections at F7/F8. |
| Brooker et al., 2016 | Three emotion-eliciting episodes (conversation with experimenter, with stranger, stranger reading a script). | Test degree to which early maternal negativity affects physiological systems associated with coping response. | 89 longitudinal twin sample (around 54% male)  R | Children showed greater left frontal alpha asymmetry during conversation episodes relative to stranger script episode, significant sex differences. |
